# Supplementary material for: Growth and characterization of Na3R(BO3)2 (R = La–Gd) borates: crystal structure, high-temperature behavior, and optical properties
Source: Royal Society of Chemistry journal article supplement (doi:10.1039/d3ce00248a), 2023-01-01
Supplement: d3ce00248a1.pdf [file d3ce00248a1.pdf]

## **Growth and characterization of Na<sub>3</sub>R(BO<sub>3</sub>)<sub>2</sub> (R=La-Gd) borates: crystal structure, high-temperature behavior, and optical properties**

*Artem B. Kuznetsov*<sup>\*1</sup>, *Ammar. Y. Jamous*<sup>2</sup>, *Valery A. Svetlichnyi*<sup>2</sup>, *Sergey N. Volkov*<sup>3</sup>, *Ilya V. Korolkov*<sup>4</sup>, *Konstantin A. Kokh*<sup>1</sup>, *Liudmila A. Gorelova*<sup>5</sup>, *Maria G. Krzhizhanovskaya*<sup>5</sup>, *Sergey M. Aksenov*<sup>3</sup> and *Alexander E. Kokh*<sup>1</sup>

<sup>1</sup>Sobolev Institute of Geology and Mineralogy SB RAS, Novosibirsk, Russia

<sup>2</sup>Tomsk State University, Tomsk, Russia

<sup>3</sup>Laboratory of Arctic Mineralogy and Material Sciences, Kola Science Centre, Apatity, Russia

<sup>4</sup>Nikolaev Institute of Inorganic Chemistry SB RAS, Novosibirsk, Russia

<sup>5</sup>Saint Petersburg State University, Saint Petersburg, Russia

Na<sub>3</sub>R(BO<sub>3</sub>)<sub>2</sub> (R=La-Gd) borates, grown with Na<sub>2</sub>O-B<sub>2</sub>O<sub>3</sub>-NaF flux, crystallize in the space group *P2<sub>1</sub>/n*. Contrary to previously published data the peaks at 980(La)-950(Gd)°C range are attributed to phase transition process, while melting process occurs around 100° higher. Another feature of thermal behavior consists in the gradual decomposition of the compound into Na<sub>3</sub>R<sub>2</sub>(BO<sub>3</sub>)<sub>3</sub>. The end member in decomposition series is Na<sub>2</sub>R<sub>2</sub>O(BO<sub>3</sub>)<sub>2</sub> which originates under oxygen/water atmosphere. In addition, the components of the thermal expansion tensor and the dependings of the unit-cell parameters of Na<sub>3</sub>Nd(BO<sub>3</sub>)<sub>2</sub> on temperature were defined. A series of Pr<sup>3+</sup>, Nd<sup>3+</sup> and Sm<sup>3+</sup> doped Na<sub>3</sub>Gd(BO<sub>3</sub>)<sub>2</sub> (NGB) borates were prepared from mixtures of grown crystals by solid-state synthesis and their photoluminescence properties were studied in detail. The excitation and emission spectra of NGB: Pr<sup>3+</sup> and NGB: Nd<sup>3+</sup> are comparable with similar compounds, and relative intensity reaches the maximum at 1 mol.% of Pr<sup>3+</sup>, Sm<sup>3+</sup> and 10 mol.% for Nd<sup>3+</sup> doped.

Table S1. Eigenvalues of the thermal expansion tensor  $\text{Na}_3\text{Nd}(\text{BO}_3)_3$ .

| Thermal expansion type                                 | Temperature ( $^{\circ}\text{C}$ ) |      |      |      |      |      |      |      |      |  |
|--------------------------------------------------------|------------------------------------|------|------|------|------|------|------|------|------|--|
|                                                        | 100                                | 200  | 300  | 400  | 500  | 600  | 700  | 800  | 900  |  |
| $\alpha_a$ ( $10^{-6} \text{ }^{\circ}\text{C}^{-1}$ ) | 5.2)                               | 5.8) | 6.5  | 7.0  | 7.5  | 7.9  | 8.3  | 8.6  | 8.9  |  |
| $\alpha_b$ ( $10^{-6} \text{ }^{\circ}\text{C}^{-1}$ ) | 18.1)                              | 19.3 | 20.5 | 21.7 | 22.9 | 24.1 | 25.2 | 26.4 | 27.5 |  |
| $\alpha_c$ ( $10^{-6} \text{ }^{\circ}\text{C}^{-1}$ ) | 28.2                               | 28.7 | 29.3 | 30.0 | 30.7 | 31.5 | 32.3 | 33.3 | 34.2 |  |
| $\alpha_V$ ( $10^{-6} \text{ }^{\circ}\text{C}^{-1}$ ) | 26.3                               | 24.2 | 22.0 | 19.8 | 17.6 | 15.5 | 13.5 | 11.5 | 9.7  |  |

Table S2. The final atomic coordinates and displacement parameters of  $\text{Na}_3\text{Gd}(\text{BO}_3)_2$  at room temperature.

| Atom | x           | y            | z            | Uiso or equiv |            |            |
|------|-------------|--------------|--------------|---------------|------------|------------|
| Gd1  | 0.84200(2)  | 0.386680(17) | 0.353185(14) | 0.00499(6)    |            |            |
| Na1  | 0.0215(2)   | 0.18805(16)  | 0.10149(13)  | 0.0108(4)     |            |            |
| Na2  | 0.0216(2)   | 0.76378(17)  | 0.34527(14)  | 0.0141(4)     |            |            |
| Na3  | 0.2171(4)   | 0.5597(2)    | 0.10638(18)  | 0.0383(7)     |            |            |
| O1   | -0.2423(4)  | 0.6367(2)    | 0.2523(2)    | 0.0087(7)     |            |            |
| O2   | 0.1922(5)   | 0.8429(3)    | 0.5224(3)    | 0.0160(8)     |            |            |
| O3   | 0.1785(5)   | 0.5777(3)    | -0.1185(2)   | 0.0159(8)     |            |            |
| O4   | 0.1714(4)   | 0.2884(3)    | 0.2947(3)    | 0.0139(7)     |            |            |
| O5   | 0.4886(4)   | 0.3965(3)    | 0.3684(3)    | 0.0138(8)     |            |            |
| O6   | 0.1666(4)   | 0.5158(3)    | 0.4202(2)    | 0.0103(7)     |            |            |
| B1   | 0.2817(7)   | 0.4003(4)    | 0.3631(4)    | 0.0072(9)     |            |            |
| B2   | 0.2551(6)   | 0.9295(5)    | 0.6283(4)    | 0.0093(9)     |            |            |
|      |             |              |              |               |            |            |
| Atom | U_11        | U_22         | U_33         | U_23          | U_13       | U_12       |
| Gd1  | 0.00405(10) | 0.00518(10)  | 0.00573(10)  | 0.00013(4)    | -          | -          |
| Na1  | 0.0115(7)   | 0.0117(7)    | 0.0093(6)    | 0.0007(5)     | 0.0009(5)  | -0.0030(5) |
| Na2  | 0.0150(7)   | 0.0155(7)    | 0.0115(7)    | -0.0043(6)    | -0.0060(5) | 0.0021(5)  |
| Na3  | 0.0779(17)  | 0.0196(10)   | 0.0172(9)    | 0.0111(10)    | -0.0084(9) | -0.0038(7) |
| O1   | 0.0113(13)  | 0.0077(11)   | 0.0070(12)   | -0.0004(9)    | -0.0022(9) | 0.0008(9)  |
| O2   | 0.0281(16)  | 0.0096(11)   | 0.0102(12)   | 0.0065(11)    | 0.0038(10) | -0.0003(9) |
| O3   | 0.0288(16)  | 0.0094(11)   | 0.0095(12)   | 0.0081(11)    | 0.0009(10) | 0.0018(10) |
| O4   | 0.0076(11)  | 0.0154(12)   | 0.0187(13)   | -0.0005(9)    | -0.0003(9) | 0.0101(10) |
| O5   | 0.0055(12)  | 0.0182(14)   | 0.0176(14)   | -0.0001(9)    | 0.0009(10) | -0.0060(9) |
| O6   | 0.0082(11)  | 0.0104(11)   | 0.0124(11)   | 0.0006(9)     | 0.0004(8)  | -0.0036(9) |
| B1   | 0.0061(17)  | 0.0091(16)   | 0.0065(16)   | 0.0006(12)    | 0.0006(12) | 0.0013(11) |
| B2   | 0.0101(17)  | 0.0086(16)   | 0.0093(16)   | 0.0012(13)    | 0.0021(12) | 0.0007(13) |

Table S3. The final atomic coordinates and displacement parameters of Na<sub>3</sub>Pr(BO<sub>3</sub>)<sub>2</sub> at room temperature.

| Atom | x           | y            | z            | Uiso or equiv |            |            |
|------|-------------|--------------|--------------|---------------|------------|------------|
| Pr1  | 0.83890(2)  | 0.386632(18) | 0.354355(14) | 0.00542(6)    |            |            |
| Na1  | 0.0214(2)   | 0.19003(16)  | 0.10343(12)  | 0.0142(4)     |            |            |
| Na2  | 0.0252(2)   | 0.76314(16)  | 0.34210(12)  | 0.0144(4)     |            |            |
| Na3  | 0.2233(4)   | 0.5638(2)    | 0.10686(18)  | 0.0543(8)     |            |            |
| O1   | -0.2392(4)  | 0.6359(2)    | 0.2464(2)    | 0.0102(6)     |            |            |
| O2   | 0.1946(5)   | 0.8479(3)    | 0.5184(2)    | 0.0192(8)     |            |            |
| O3   | 0.1870(5)   | 0.5809(3)    | -0.1157(2)   | 0.0195(8)     |            |            |
| O4   | 0.1729(3)   | 0.2901(3)    | 0.2952(2)    | 0.0133(6)     |            |            |
| O5   | 0.4832(4)   | 0.3994(3)    | 0.3682(3)    | 0.0187(8)     |            |            |
| O6   | 0.1668(3)   | 0.5190(3)    | 0.4155(2)    | 0.0106(6)     |            |            |
| B1   | 0.2793(6)   | 0.4024(4)    | 0.3612(3)    | 0.0080(9)     |            |            |
| B2   | 0.2552(5)   | 0.9332(4)    | 0.6244(3)    | 0.0094(9)     |            |            |
|      |             |              |              |               |            |            |
| Atom | U_11        | U_22         | U_33         | U_23          | U_13       | U_12       |
| Pr1  | 0.00458(10) | 0.00552(10)  | 0.00614(10)  | 0.00003(5)    | 0.00032(6) | 0.00051(4) |
| Na1  | 0.0141(7)   | 0.0151(7)    | 0.0134(6)    | 0.0016(5)     | 0.0008(5)  | -0.0035(5) |
| Na2  | 0.0146(7)   | 0.0156(7)    | 0.0128(6)    | -0.0038(5)    | -0.0057(5) | 0.0020(5)  |
| Na3  | 0.124(2)    | 0.0199(10)   | 0.0188(8)    | 0.0168(12)    | 0.0150(11) | -0.0045(8) |
| O1   | 0.0136(12)  | 0.0074(10)   | 0.0095(11)   | 0.0001(9)     | -0.0041(8) | 0.0001(8)  |
| O2   | 0.0384(17)  | 0.0094(11)   | 0.0097(11)   | 0.0077(11)    | 0.0057(10) | 0.0006(9)  |
| O3   | 0.0384(17)  | 0.0097(11)   | 0.0104(11)   | 0.0094(11)    | 0.0019(10) | 0.0005(9)  |
| O4   | 0.0075(11)  | 0.0151(12)   | 0.0173(10)   | -0.0007(9)    | -0.0005(8) | -0.0086(9) |
| O5   | 0.0075(12)  | 0.0225(14)   | 0.0259(14)   | 0.0002(9)     | 0.0018(10) | 0.0096(10) |
| O6   | 0.0079(10)  | 0.0105(11)   | 0.0134(10)   | 0.0002(8)     | 0.0014(8)  | -0.0046(8) |
| B1   | 0.0068(16)  | 0.0096(15)   | 0.0077(14)   | 0.0011(11)    | 0.0009(11) | 0.0010(10) |
| B2   | 0.0092(16)  | 0.0083(15)   | 0.0108(14)   | 0.0006(12)    | 0.0016(11) | 0.0010(12) |

Table S4. The experimental details of the data collection and refinement results of Na<sub>3</sub>Gd(BO<sub>3</sub>)<sub>2</sub> at temperature 400°C.

|                    |                                                   |
|--------------------|---------------------------------------------------|
| Sample             | III                                               |
| Chemical formula   | Na <sub>3</sub> Gd(BO <sub>3</sub> ) <sub>2</sub> |
| Formula weight (g) | 687.68                                            |
| Temperature (K)    | 673                                               |
| Cell setting       | Monoclinic                                        |

|                                                     |                                                                    |
|-----------------------------------------------------|--------------------------------------------------------------------|
| Space group                                         | $P2_1/n$                                                           |
| $a$ (Å)                                             | 6.5511(1)                                                          |
| $b$ (Å)                                             | 8.8012(2)                                                          |
| $c$ (Å)                                             | 10.2424(1)                                                         |
| $\beta$ (°)                                         | 91.167(2)                                                          |
| $V$ (Å <sup>3</sup> )                               | 590.43(2)                                                          |
| $Z$                                                 | 2                                                                  |
| Calculated density, $D_x$ (g cm <sup>-3</sup> )     | 3.952                                                              |
| Crystal size (mm)                                   | 0.03 × 0.04 × 0.05                                                 |
| Crystal form                                        | Anhedral grain                                                     |
| <b>Data collection</b>                              |                                                                    |
| Diffractometer                                      | Rigaku XtaLAB Synergy, HyPix detector                              |
| Radiation; $\lambda$                                | MoK $\alpha$ ; 0.71073                                             |
| Absorption coefficient, $\mu$ (mm <sup>-1</sup> )   | 11.668                                                             |
| $F$ (000)                                           | 620                                                                |
| Data range $\theta$ (°); $h, k, l$                  | 3.658–29.666;<br>–8 < $h$ < 9,<br>–11 < $k$ < 8,<br>–14 < $l$ < 14 |
| No. of measured reflections                         | 7697                                                               |
| Total reflections ( $N_2$ ) / observed ( $N_1$ )    | 1489 / 1362                                                        |
| Criterion for observed reflections                  | $I > 3\sigma(I)$                                                   |
| $R_{\text{int}}$ (%)                                | 0.0406                                                             |
| <b>Refinement</b>                                   |                                                                    |
| Refinement on                                       | Full-matrix least squares on $F$                                   |
| Weight scheme                                       | $1/(\sigma^2 F  + 0.0001F^2)$                                      |
| $R_1, wR_1$ [ $I > 3\sigma(I)$ ]                    | 0.0196, 0.0434                                                     |
| $R_1, wR_1$ [all]                                   | 0.0237, 0.0455                                                     |
| GooF (Goodness of fit)                              | 1.064                                                              |
| Max./min. residual $e$ density, (eÅ <sup>-3</sup> ) | 0.958 / –1.081                                                     |

Tables S5. The final atomic coordinates and displacement parameters of Na<sub>3</sub>Gd(BO<sub>3</sub>)<sub>2</sub> at temperature 400°C.

| Atom | x          | y           | z           | Uiso or equiv |
|------|------------|-------------|-------------|---------------|
| Gd1  | 0.83920(2) | 0.11197(2)  | 0.35224(2)  | 0.01605(9)    |
| Na1  | 0.0179(2)  | 0.30922(18) | 0.10039(16) | 0.0320(4)     |
| Na2  | 0.0233(3)  | 0.7379(2)   | 0.34709(17) | 0.0361(4)     |
| Na3  | 0.2712(6)  | 0.4393(3)   | 0.3943(2)   | 0.0840(9)     |
| B1   | 0.2795(7)  | 0.0989(4)   | 0.3613(4)   | 0.0188(8)     |
| B2   | 0.2548(7)  | 0.5717(5)   | 0.6300(5)   | 0.0226(9)     |
| O1   | 0.1688(4)  | -0.0129(3)  | 0.4237(3)   | 0.0307(6)     |
| O2   | 0.2601(4)  | 0.6373(3)   | 0.7529(3)   | 0.0246(6)     |
| O3   | 0.1696(4)  | 0.2056(3)   | 0.2932(3)   | 0.0371(7)     |

| O4   | 0.4855(5)   | 0.1028(4)   | 0.3658(4)   | 0.0389(8)   |            |            |
|------|-------------|-------------|-------------|-------------|------------|------------|
| O5   | 0.3130(6)   | 0.4244(3)   | 0.6192(3)   | 0.0379(8)   |            |            |
| O6   | 0.1923(5)   | 0.6591(3)   | 0.5255(3)   | 0.0363(7)   |            |            |
|      |             |             |             |             |            |            |
| Atom | U_11        | U_22        | U_33        | U_23        | U_13       | U_12       |
| Gd1  | 0.01551(12) | 0.01648(12) | 0.01613(13) | 0.00082(6)  | -          | -          |
| Na1  | 0.0325(9)   | 0.0354(9)   | 0.0282(9)   | 0.0048(7)   | 0.0042(7)  | -0.0017(7) |
| Na2  | 0.0387(10)  | 0.0378(9)   | 0.0312(9)   | -0.0029(7)  | -0.0133(8) | 0.0087(8)  |
| Na3  | 0.166(3)    | 0.0451(12)  | 0.0398(14)  | -0.0066(11) | 0.0116(16) | 0.0132(16) |
| B1   | 0.0187(19)  | 0.022(2)    | 0.016(2)    | -0.0021(15) | 0.0026(16) | 0.0006(15) |
| B2   | 0.022(2)    | 0.0208(19)  | 0.025(2)    | 0.0019(17)  | 0.0001(17) | 0.0012(16) |
| O1   | 0.0224(14)  | 0.0343(15)  | 0.0354(17)  | 0.0139(13)  | 0.0032(12) | 0.0013(11) |
| O2   | 0.0326(16)  | 0.0192(13)  | 0.0219(15)  | -0.0009(11) | 0.0028(12) | 0.0004(11) |
| O3   | 0.0197(14)  | 0.0427(17)  | 0.049(2)    | 0.0218(15)  | 0.0017(13) | 0.0023(12) |
| O4   | 0.0158(14)  | 0.054(2)    | 0.047(2)    | 0.0182(15)  | 0.0008(14) | 0.0002(12) |
| O5   | 0.067(2)    | 0.0222(13)  | 0.0246(16)  | 0.0035(12)  | 0.0002(15) | 0.0158(14) |
| O6   | 0.063(2)    | 0.0230(13)  | 0.0227(15)  | 0.0026(12)  | 0.0091(14) | 0.0089(14) |

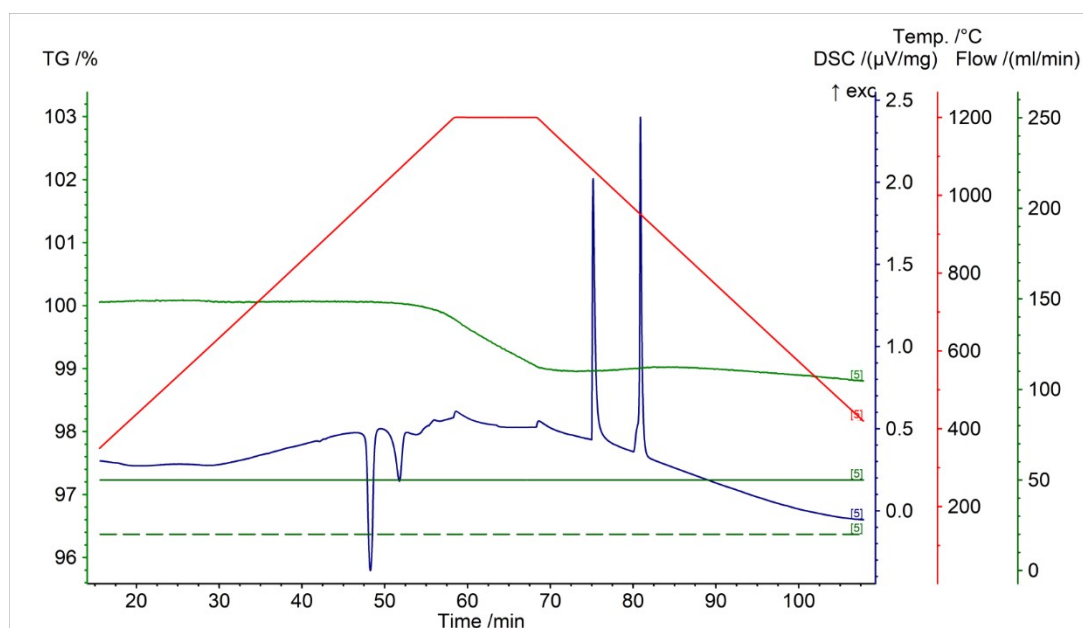

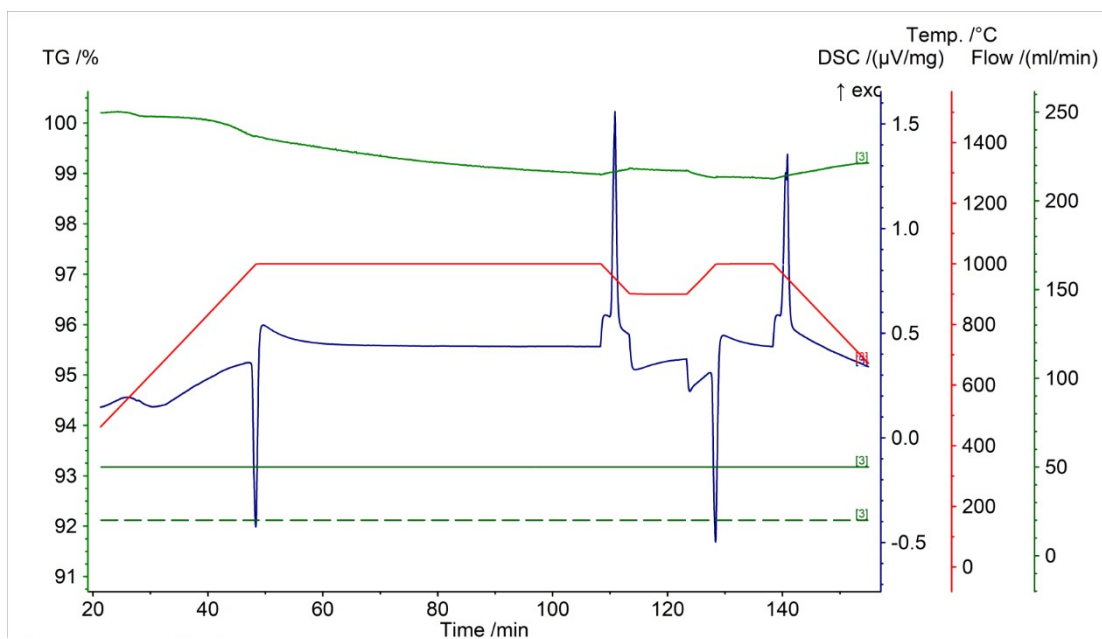

Figure S1. DSC curve of  $\text{Na}_3\text{Nd}(\text{BO}_3)_2$

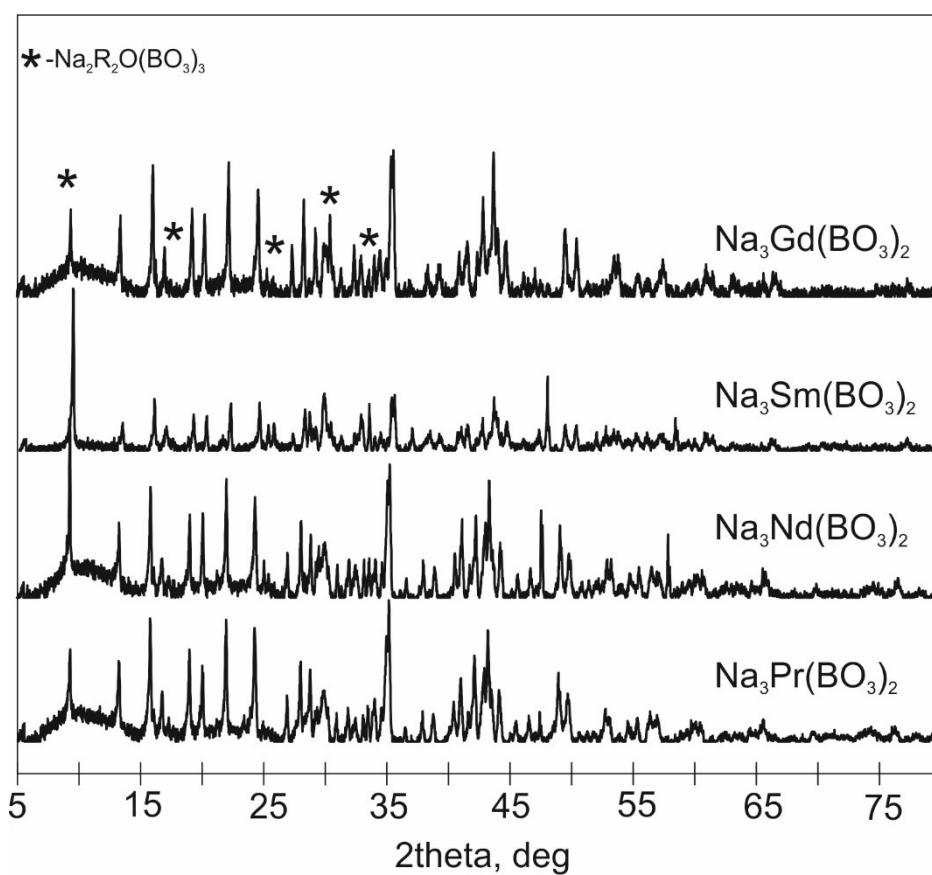

Figure S2.  $\text{Na}_3\text{R}(\text{BO}_3)_2$  XRD patterns after heating at 1200  $^\circ\text{C}$ .

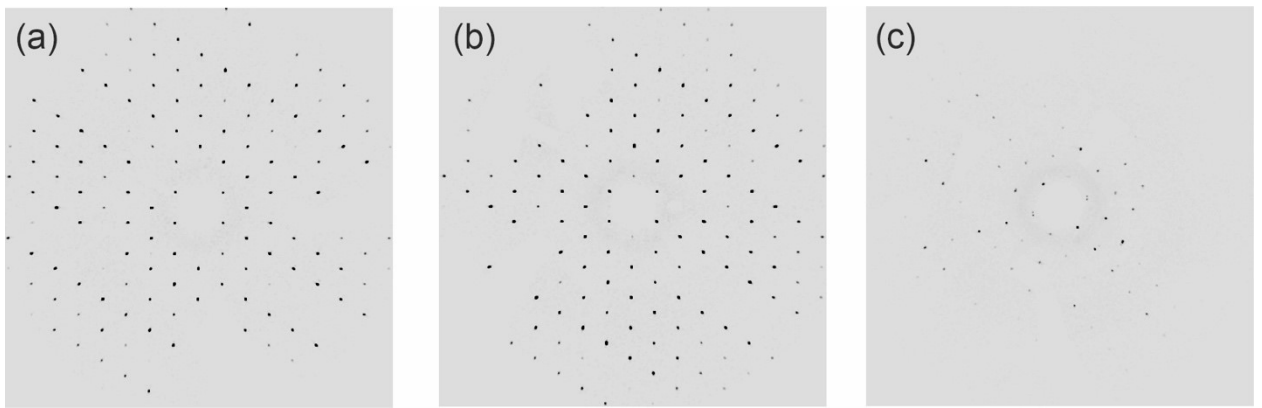

Figure S3. Reciprocal space reconstructions for  $\text{Na}_3\text{Gd}(\text{BO}_3)_2$  in the  $h0l$  plane at 27 °C (a), 600 °C (b) and 800 °C (c).

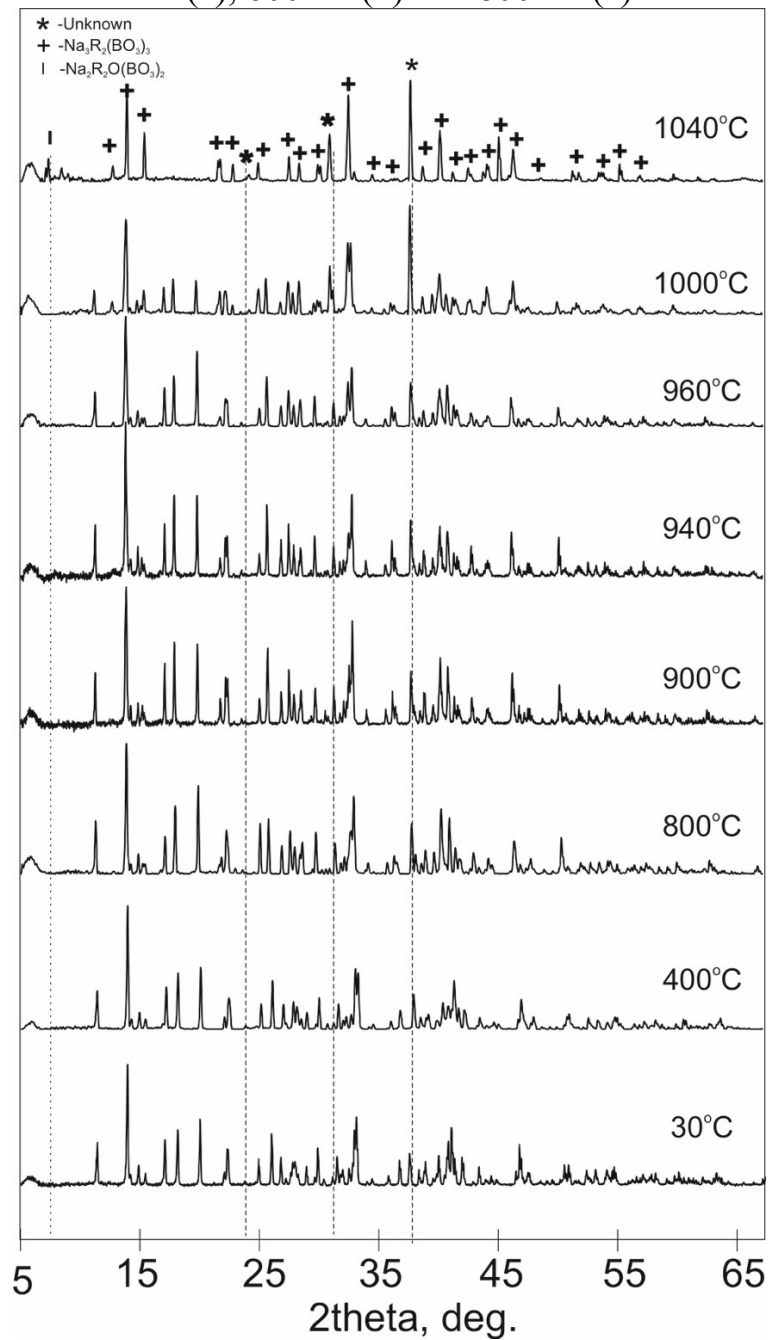

Figure S4. Powder XRD patterns of  $\text{Na}_3\text{Nd}(\text{BO}_3)_2$  *in-situ* in temperature range 30-1040°C

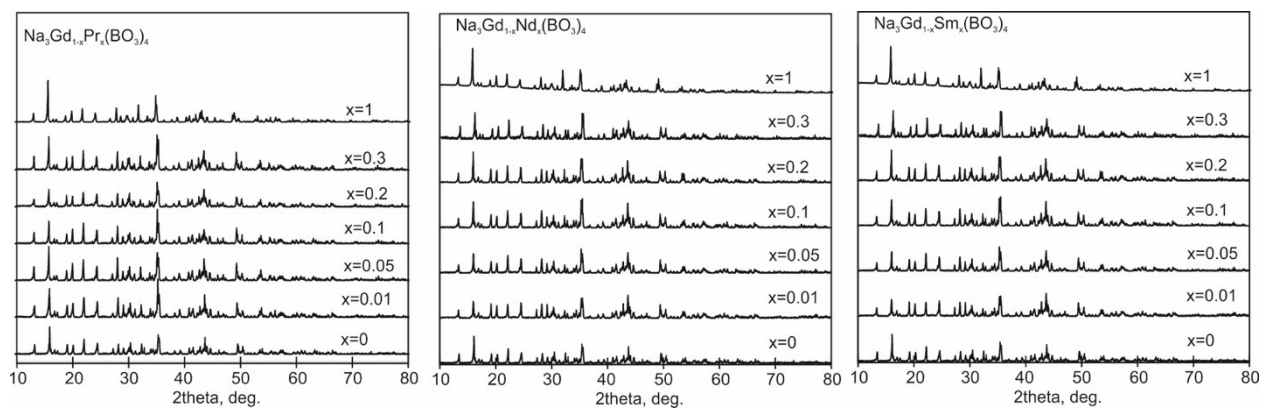

Figure S5. XRD patterns of  $\text{Na}_3\text{Gd}_{1-x}(\text{BO}_3)_2 : x\text{Pr}^{3+}/\text{Nd}^{3+}/\text{Sm}^{3+}$  samples

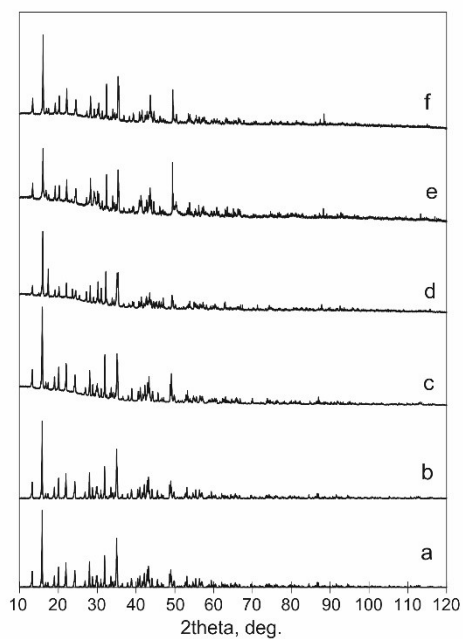

Figure S6. XRD patterns of  $\text{Na}_3\text{R}(\text{BO}_3)_3$   $\text{R} = \text{La}$ (a),  $\text{Pr}$ (b),  $\text{Nd}$ (c),  $\text{Sm}$ (d),  $\text{Eu}$ (e) and  $\text{Gd}$ (f).
